# Supplementary material for: Development of Low–Cost Air Quality Stations for Next Generation Monitoring Networks: Calibration and Validation of NO2 and O3 Sensors
Source: Copernicus journal article supplement (doi:10.5194/egusphere-2023-673), 2023-05-02
Supplement: Supplementary file 1 [file egusphere-2023-673-supplement.pdf]

# ***Supplement of Development of Low-Cost Air Quality Stations for Next Generation Monitoring Networks: Calibration and Validation of NO<sub>2</sub> and O<sub>3</sub> Sensors***

**Table S1.** Summary of pre-deployment calibration and field validation procedures performed in the study.

| <b>City</b> | <b>Lat.<br/>(deg N)</b> | <b>Lon.<br/>(deg E)</b> | <b>Time period</b>    | <b>Time step</b> | <b>Process</b>             | <b>No. records by pollutant<br/>(AQ1–AQ2)</b>                 |
|-------------|-------------------------|-------------------------|-----------------------|------------------|----------------------------|---------------------------------------------------------------|
| Florence    | 43°47'52"               | 11°11'31"               | 2017/07/19–2017/09/27 | 3 min            | Pre-deployment calibration | NO <sub>2</sub> : 19223–17275<br>O <sub>3</sub> : 19223–17275 |
| Montale     | 43°54'57"               | 11°00'26"               | 2018/06/19–2019/08/22 | 1 H              | Field validation           | NO <sub>2</sub> : 7383–9340<br>O <sub>3</sub> : 7344–9303     |

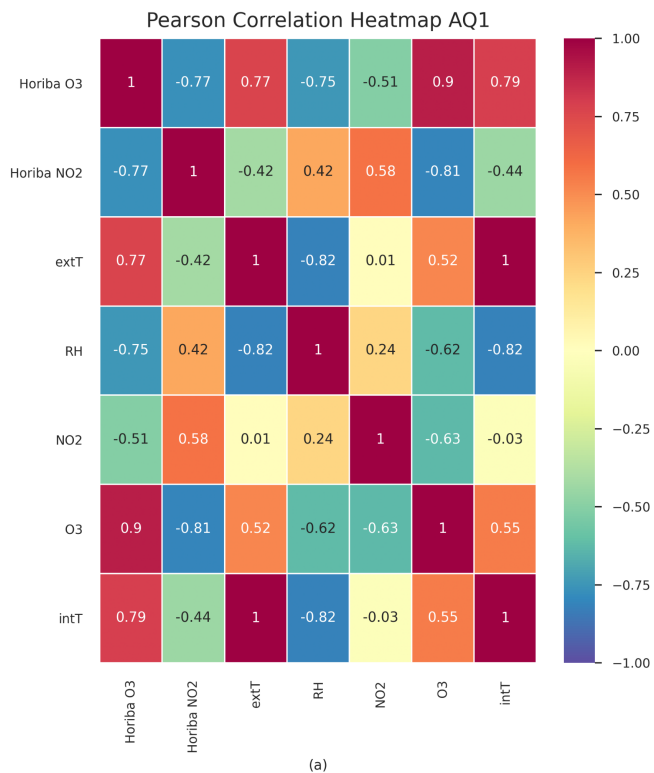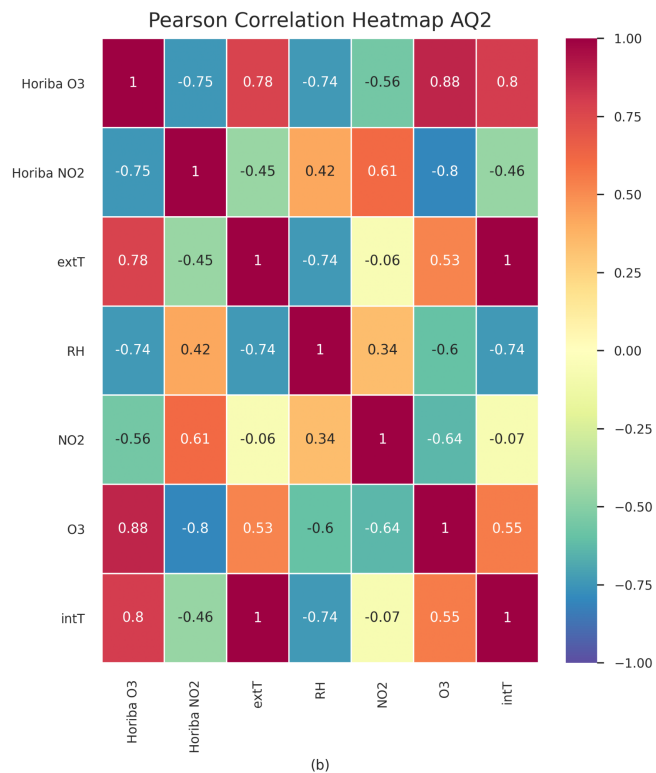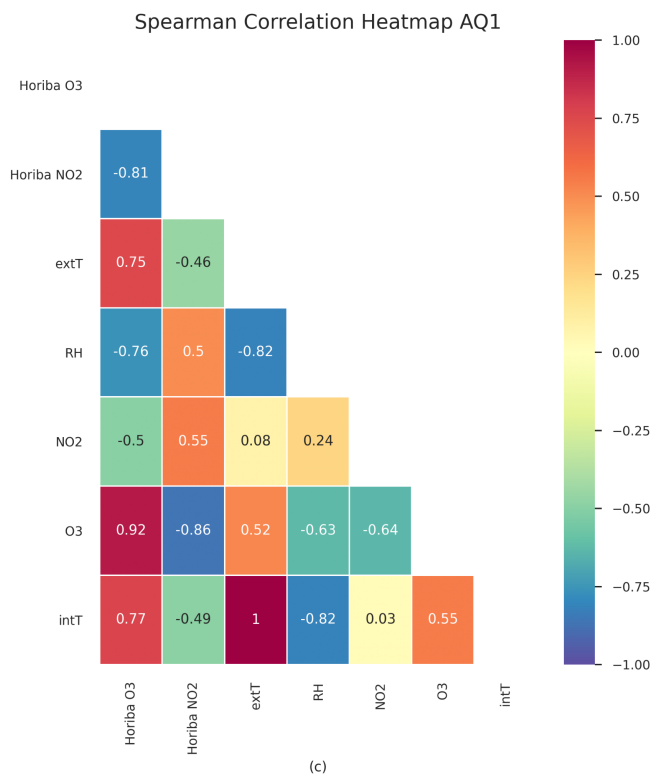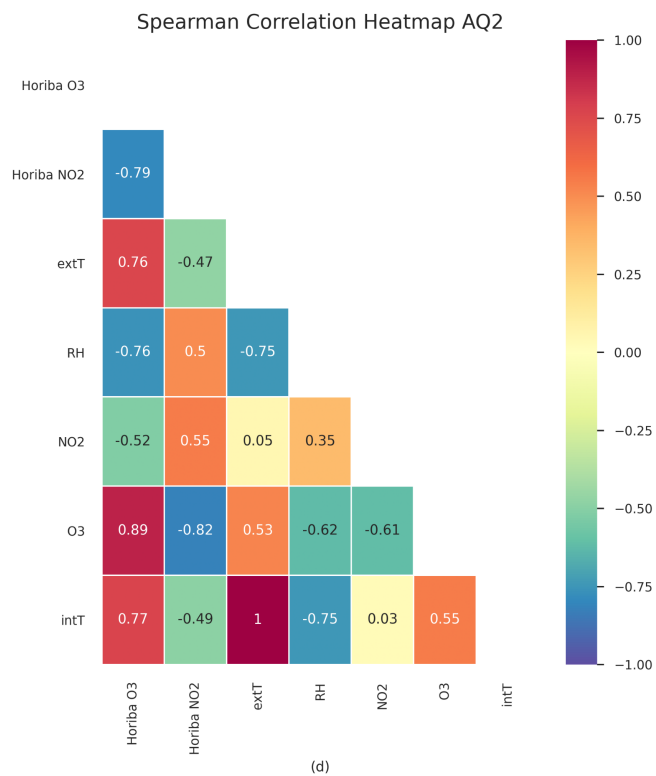

**Figure S2.** Correlation matrices for AQ1 and AQ2 calibration: Pearson correlation for AQ1 (a) and AQ2 (b); Spearman correlation for AQ1 (c) and AQ2 (d).

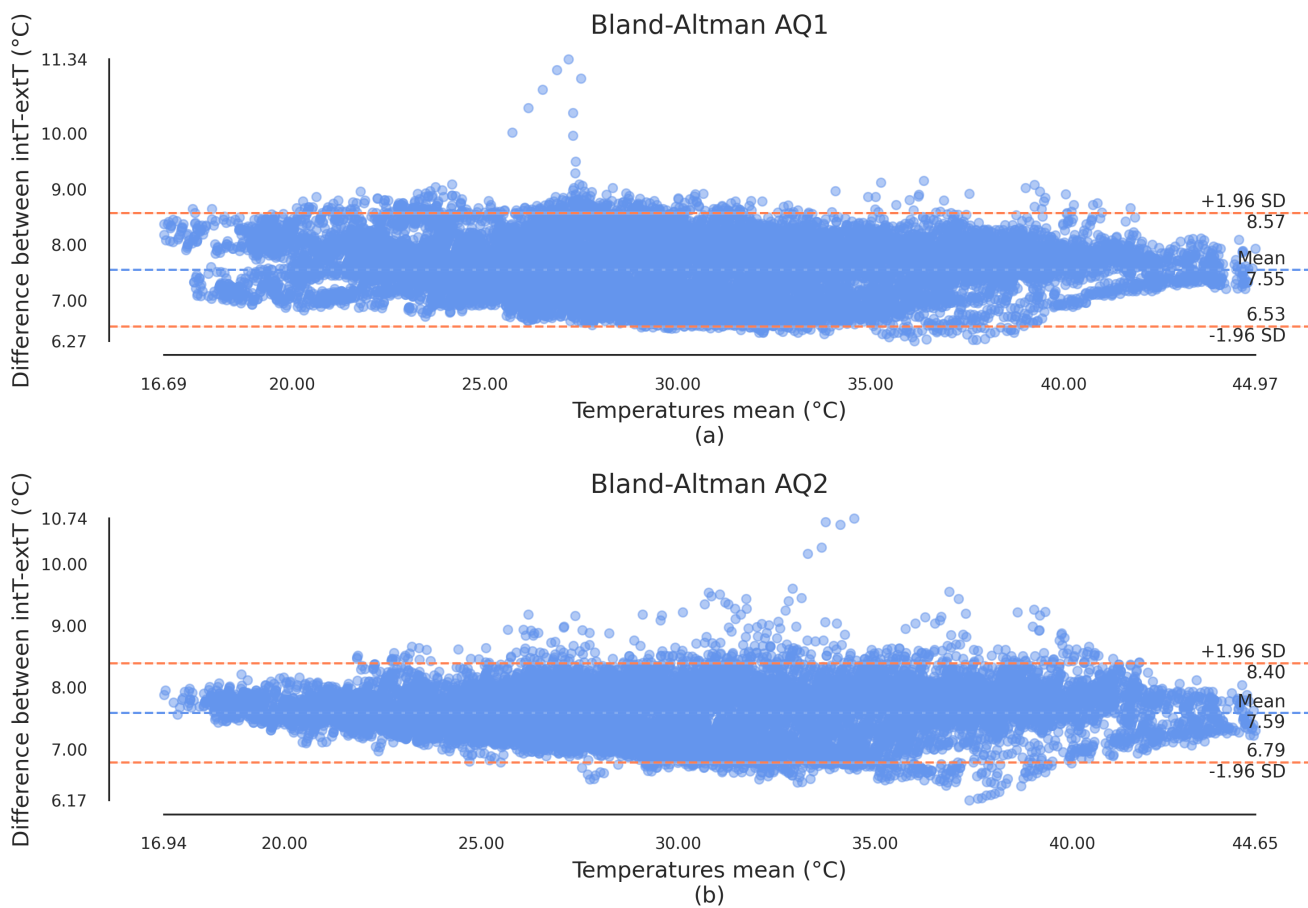

**Figure S3.** Bland–Altman plots of extT and intT for AQ1 (a) and AQ2 (b). The red lines indicate the limit of agreement ( $\pm 1.96$  SD) of temperature differences, whilst the blue lines show the average difference between the temperatures.

**Table S4.** Variance inflation factors (VIF) for the main covariates set.

| Pollutant | AQ id | Variables           | Intercept | O3   | NO2  | intT   | extT   | RH   |
|-----------|-------|---------------------|-----------|------|------|--------|--------|------|
| O3        | AQ1   | O3,intT             | 47.38     | 1.44 | -    | 1.44   | -      | -    |
|           |       | O3,intT,RH          | 299.06    | 1.63 | -    | 3.08   | -      | 3.45 |
|           |       | O3,intT,extT,RH     | 441.18    | 1.95 | -    | 151.19 | 147.78 | 3.55 |
|           |       | O3,NO2,intT,RH      | 304.88    | 3.13 | 2.25 | 4.00   | -      | 3.61 |
|           |       | O3,NO2,intT,extT,RH | 465.46    | 3.24 | 2.35 | 153.54 | 154.09 | 3.77 |
|           | AQ2   | O3,intT             | 54.05     | 1.44 | -    | 1.44   | -      | -    |
|           |       | O3,intT,RH          | 210.67    | 1.63 | -    | 2.30   | -      | 2.52 |
|           |       | O3,intT,extT,RH     | 472.01    | 1.92 | -    | 237.86 | 232.71 | 2.57 |
|           |       | O3,NO2,intT,RH      | 221.90    | 2.97 | 2.24 | 3.03   | -      | 2.72 |
|           |       | O3,NO2,intT,extT,RH | 484.17    | 3.25 | 2.24 | 238.39 | 232.72 | 2.77 |
| NO2       | AQ1   | NO2,intT            | 36.86     | -    | 1.00 | 1.00   | -      | -    |
|           |       | NO2,intT,RH         | 241.53    | -    | 1.17 | 3.37   | -      | 3.58 |
|           |       | NO2,intT,extT,RH    | 434.86    | -    | 1.42 | 144.55 | 149.03 | 3.70 |
|           |       | NO2,O3,intT,RH      | 304.88    | 3.13 | 2.25 | 4.00   | -      | 3.61 |
|           |       | NO2,O3,intT,extT,RH | 465.46    | 3.24 | 2.35 | 153.54 | 154.09 | 3.77 |
|           | AQ2   | NO2,intT            | 37.46     | -    | 1.01 | 1.01   | -      | -    |
|           |       | NO2,intT,RH         | 149.67    | -    | 1.23 | 2.40   | -      | 2.71 |
|           |       | NO2,intT,extT,RH    | 472.57    | -    | 1.32 | 211.00 | 212.93 | 2.74 |
|           |       | NO2,O3,intT,RH      | 221.90    | 2.97 | 2.24 | 3.03   | -      | 2.72 |
|           |       | NO2,O3,intT,extT,RH | 484.17    | 3.25 | 2.24 | 238.39 | 232.72 | 2.77 |

**Table S5.** Summary of MLR O3 models for AQ1 and AQ2.

| Pollutant      | AQ id   | Variables      | Coefficient |           |           |           |           | R <sup>2</sup> | RMSE  | AIC      | Stat.             |       |       |
|----------------|---------|----------------|-------------|-----------|-----------|-----------|-----------|----------------|-------|----------|-------------------|-------|-------|
|                |         |                | $\beta_0$   | $\beta_1$ | $\beta_2$ | $\beta_3$ | $\beta_4$ |                |       |          | AdjR <sup>2</sup> | MAE   | MBE   |
| O3             | AQ1     | O3             | -146.10     | 0.40      | -         | -         | -         | 0.81           | 16.92 | 1.09E+05 | 0.81              | 13.42 | -0.28 |
|                |         | intT           | -109.92     | 5.46      | -         | -         | -         | 0.61           | 24.33 | 1.19E+05 | 0.62              | 19.56 | 0.21  |
|                |         | RH             | 165.02      | -1.71     | -         | -         | -         | 0.57           | 25.61 | 1.21E+05 | 0.57              | 20.35 | -0.17 |
|                |         | NO2            | 97.15       | -0.31     | -         | -         | -         | 0.27           | 33.63 | 1.27E+05 | 0.27              | 27.42 | -0.46 |
|                |         | O3,intT        | -186.58     | 0.30      | 2.88      | -         | -         | 0.94           | 9.92  | 9.52E+04 | 0.94              | 7.39  | -0.06 |
|                |         | O3,RH          | -61.47      | 0.32      | -0.71     | -         | -         | 0.88           | 13.61 | 1.04E+05 | 0.88              | 10.69 | -0.26 |
|                |         | NO2,O3         | -162.73     | 0.05      | 0.43      | -         | -         | 0.82           | 16.74 | 1.09E+05 | 0.82              | 13.24 | -0.23 |
|                |         | RH,intT        | -12.71      | -0.71     | 3.70      | -         | -         | 0.65           | 23.07 | 1.17E+05 | 0.65              | 18.21 | 0.09  |
|                |         | NO2,intT       | -84.20      | -0.29     | 5.36      | -         | -         | 0.86           | 14.52 | 1.05E+05 | 0.86              | 11.35 | -0.11 |
|                |         | NO2,RH         | 170.74      | -0.21     | -1.52     | -         | -         | 0.69           | 21.88 | 1.17E+05 | 0.69              | 17.50 | -0.39 |
|                | AQ2     | O3,RH,intT     | -193.19     | 0.30      | 0.04      | 2.97      | -         | 0.94           | 9.93  | 9.52E+04 | 0.94              | 7.39  | -0.06 |
|                |         | NO2,O3,intT    | -159.76     | -0.10     | 0.23      | 3.44      | -         | 0.95           | 8.69  | 9.18E+04 | 0.95              | 6.39  | -0.12 |
|                |         | NO2,O3,RH      | -64.32      | 0.01      | 0.32      | -0.71     | -         | 0.88           | 13.60 | 1.04E+05 | 0.88              | 10.69 | -0.26 |
|                |         | NO2,RH,intT    | -87.77      | -0.29     | 0.03      | 5.42      | -         | 0.86           | 14.52 | 1.05E+05 | 0.86              | 11.36 | -0.11 |
|                |         | NO2,O3,RH,intT | -180.76     | -0.11     | 0.23      | 0.15      | 3.79      | 0.95           | 8.62  | 9.14E+04 | 0.95              | 6.30  | -0.10 |
|                |         | O3             | -140.53     | 0.31      | -         | -         | -         | 0.77           | 17.58 | 9.93E+04 | 0.77              | 14.11 | 0.14  |
|                |         | intT           | -90.68      | 5.04      | -         | -         | -         | 0.64           | 22.12 | 1.04E+05 | 0.64              | 18.07 | -0.24 |
|                |         | RH             | 148.13      | -1.37     | -         | -         | -         | 0.55           | 24.62 | 1.07E+05 | 0.55              | 19.48 | -0.29 |
|                |         | NO2            | 101.33      | -0.34     | -         | -         | -         | 0.31           | 30.43 | 1.12E+05 | 0.31              | 24.74 | 0.23  |
|                |         | O3,intT        | -174.35     | 0.23      | 2.86      | -         | -         | 0.91           | 10.86 | 8.83E+04 | 0.91              | 8.18  | -0.05 |
| O3,RH          | -59.90  | 0.24           | -0.61       | -         | -         | 0.84      | 14.77     | 9.51E+04       | 0.84  | 11.96    | -0.03             |       |       |
| NO2,O3         | -139.86 | -0.00          | 0.31        | -         | -         | 0.77      | 17.58     | 9.93E+04       | 0.77  | 14.11    | 0.14              |       |       |
| RH,intT        | -9.43   | -0.60          | 3.52        | -         | -         | 0.69      | 20.50     | 1.03E+05       | 0.69  | 16.33    | -0.30             |       |       |
| NO2,intT       | -62.83  | -0.30          | 4.79        | -         | -         | 0.89      | 12.22     | 9.07E+04       | 0.89  | 9.52     | -0.08             |       |       |
| NO2,RH         | 150.72  | -0.21          | -1.15       | -         | -         | 0.65      | 21.64     | 1.04E+05       | 0.65  | 17.38    | -0.13             |       |       |
| O3,RH,intT     | -155.80 | 0.22           | -0.12       | 2.62      | -         | 0.91      | 10.76     | 8.81E+04       | 0.91  | 8.18     | -0.07             |       |       |
| NO2,O3,intT    | -129.74 | -0.16          | 0.14        | 3.51      | -         | 0.94      | 8.59      | 8.30E+04       | 0.95  | 6.51     | -0.04             |       |       |
| NO2,O3,RH      | -53.73  | -0.02          | 0.24        | -0.62     | -         | 0.84      | 14.76     | 9.51E+04       | 0.84  | 11.96    | -0.03             |       |       |
| NO2,RH,intT    | -60.82  | -0.30          | -0.02       | 4.76      | -         | 0.89      | 12.21     | 9.07E+04       | 0.89  | 9.52     | -0.09             |       |       |
| NO2,O3,RH,intT | -133.43 | -0.16          | 0.14        | 0.03      | 3.58      | 0.94      | 8.58      | 8.29E+04       | 0.95  | 6.50     | -0.03             |       |       |

**Table S6.** Summary of MLR NO<sub>2</sub> models for AQ1 and AQ2.

| Pollutant       | AQ id          | Variables | Coefficient |           |           |           |           | R <sup>2</sup> | RMSE     | AIC      | Stat              |       |       |
|-----------------|----------------|-----------|-------------|-----------|-----------|-----------|-----------|----------------|----------|----------|-------------------|-------|-------|
|                 |                |           | $\beta_0$   | $\beta_1$ | $\beta_2$ | $\beta_3$ | $\beta_4$ |                |          |          | AdjR <sup>2</sup> | MAE   | MBE   |
| NO <sub>2</sub> | AQ1            | NO2       | 13.03       | 0.15      | -         | -         | -         | 0.34           | 14.22    | 1.05E+05 | 0.34              | 10.91 | 0.09  |
|                 |                | intT      | 70.28       | -1.36     | -         | -         | -         | 0.19           | 15.72    | 1.07E+05 | 0.19              | 12.14 | -0.16 |
|                 |                | RH        | 2.19        | 0.42      | -         | -         | -         | 0.18           | 15.81    | 1.08E+05 | 0.18              | 12.25 | -0.07 |
|                 |                | O3        | 111.52      | -0.16     | -         | -         | -         | 0.66           | 10.22    | 9.61E+04 | 0.66              | 7.74  | -0.01 |
|                 |                | NO2,intT  | 57.18       | 0.15      | -1.30     | -         | -         | 0.52           | 12.14    | 1.01E+05 | 0.52              | 9.17  | 0.01  |
|                 |                | NO2,RH    | -1.44       | 0.13      | 0.30      | -         | -         | 0.42           | 13.28    | 1.03E+05 | 0.42              | 9.99  | 0.08  |
|                 |                | NO2,O3    | 101.09      | 0.03      | -0.14     | -         | -         | 0.67           | 10.09    | 9.57E+04 | 0.67              | 7.64  | 0.01  |
|                 |                | RH,intT   | 47.73       | 0.17      | -0.95     | -         | -         | 0.20           | 15.59    | 1.07E+05 | 0.20              | 12.02 | -0.13 |
|                 |                | O3,intT   | 111.23      | -0.16     | 0.02      | -         | -         | 0.66           | 10.22    | 9.61E+04 | 0.66              | 7.74  | -0.01 |
|                 |                | O3,RH     | 127.09      | -0.18     | -0.13     | -         | -         | 0.67           | 10.10    | 9.57E+04 | 0.67              | 7.67  | -0.01 |
|                 | NO2,RH,intT    | 89.29     | 0.16        | -0.24     | -1.90     | -         | 0.53      | 11.96          | 1.00E+05 | 0.53     | 9.09              | -0.02 |       |
|                 | NO2,O3,intT    | 100.92    | 0.04        | -0.13     | -0.19     | -         | 0.67      | 10.06          | 9.57E+04 | 0.67     | 7.61              | 0.01  |       |
|                 | NO2,O3,RH      | 116.25    | 0.02        | -0.16     | -0.11     | -         | 0.67      | 10.01          | 9.55E+04 | 0.67     | 7.61              | 0.01  |       |
|                 | O3,RH,intT     | 150.78    | -0.17       | -0.27     | -0.54     | -         | 0.68      | 9.97           | 9.53E+04 | 0.67     | 7.57              | -0.05 |       |
|                 | NO2,O3,RH,intT | 144.78    | 0.05        | -0.14     | -0.32     | -0.93     | 0.69      | 9.68           | 9.45E+04 | 0.69     | 7.36              | -0.03 |       |
|                 | AQ2            | NO2       | 11.81       | 0.16      | -         | -         | -         | 0.38           | 12.86    | 9.22E+04 | 0.38              | 9.83  | -0.09 |
|                 |                | intT      | 66.88       | -1.31     | -         | -         | -         | 0.21           | 14.45    | 9.49E+04 | 0.21              | 10.91 | 0.07  |
|                 |                | RH        | 4.94        | 0.35      | -         | -         | -         | 0.19           | 14.67    | 9.54E+04 | 0.19              | 11.09 | 0.08  |
|                 |                | O3        | 113.00      | -0.13     | -         | -         | -         | 0.64           | 9.79     | 8.58E+04 | 0.64              | 7.35  | -0.04 |
|                 |                | NO2,intT  | 52.45       | 0.16      | -1.19     | -         | -         | 0.55           | 10.91    | 8.85E+04 | 0.55              | 8.19  | -0.01 |
| NO2,RH          |                | 3.19      | 0.14        | 0.20      | -         | -         | 0.43      | 12.28          | 9.12E+04 | 0.43     | 9.25              | -0.03 |       |
| NO2,O3          |                | 97.76     | 0.05        | -0.11     | -         | -         | 0.66      | 9.53           | 8.52E+04 | 0.66     | 7.15              | -0.06 |       |
| RH,intT         |                | 47.54     | 0.14        | -0.95     | -         | -         | 0.23      | 14.28          | 9.47E+04 | 0.23     | 10.73             | 0.08  |       |
| O3,intT         |                | 114.00    | -0.13       | -0.08     | -         | -         | 0.64      | 9.78           | 8.58E+04 | 0.64     | 7.34              | -0.04 |       |
| O3,RH           |                | 123.40    | -0.14       | -0.08     | -         | -         | 0.64      | 9.72           | 8.56E+04 | 0.64     | 7.32              | -0.07 |       |
| NO2,RH,intT     | 77.38          | 0.17      | -0.20       | -1.67     | -         | 0.57      | 10.71     | 8.79E+04       | 0.57     | 8.07     | -0.04             |       |       |
| NO2,O3,intT     | 96.78          | 0.06      | -0.10       | -0.34     | -         | 0.67      | 9.41      | 8.50E+04       | 0.67     | 7.04     | -0.04             |       |       |
| NO2,O3,RH       | 107.47         | 0.04      | -0.12       | -0.07     | -         | 0.66      | 9.48      | 8.51E+04       | 0.66     | 7.14     | -0.08             |       |       |
| O3,RH,intT      | 137.80         | -0.13     | -0.15       | -0.39     | -         | 0.65      | 9.63      | 8.53E+04       | 0.65     | 7.26     | -0.06             |       |       |
| NO2,O3,RH,intT  | 126.78         | 0.08      | -0.10       | -0.23     | -0.87     | 0.69      | 9.07      | 8.40E+04       | 0.69     | 6.83     | -0.08             |       |       |

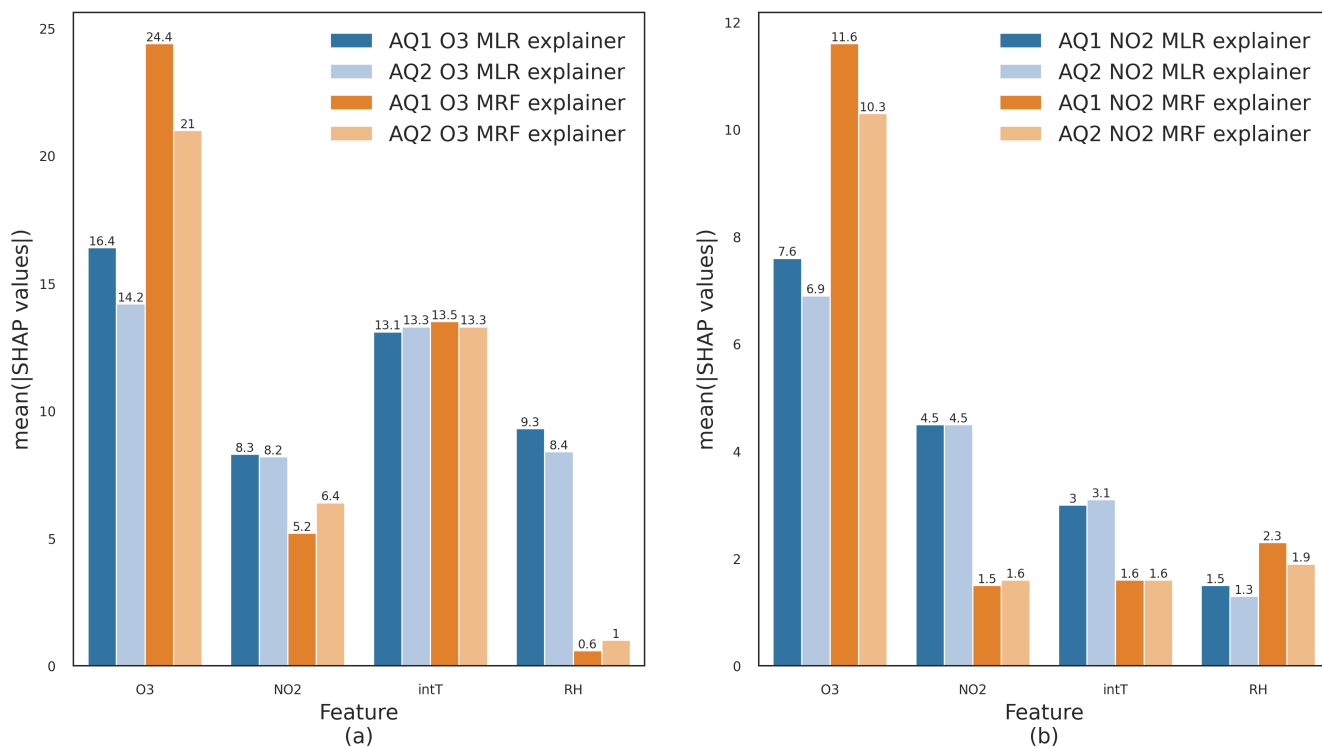

**Figure S7.** Mean absolute SHAP values of all features for MLR and MRF models for O3 and NO2 concentrations at AQ1 and AQ2 stations. The effect of intT, RH, O3 and NO2 raw data on the overall output of the training model is also shown.

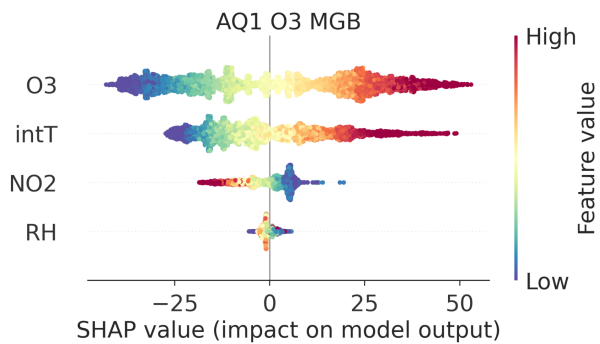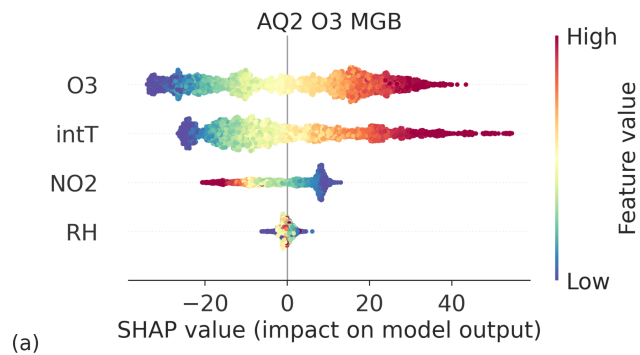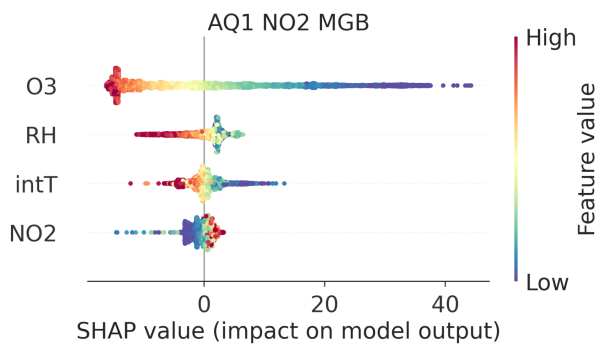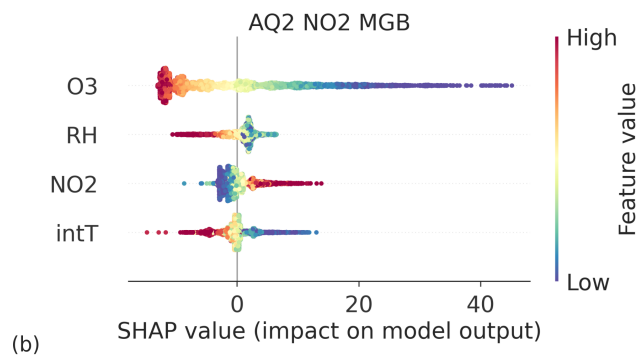

**Figure S8.** Beeswarm MGB



**Table S9.** Statistics of the MLR and MRF calibrated models assessed during the field validation procedure.

| Pollutant | AQ id | Stat. | MLR   | MRF   |
|-----------|-------|-------|-------|-------|
| O3        | AQ1   | r     | 0.92  | 0.81  |
|           |       | CRMSD | 15.98 | 24.13 |
|           |       | RMSE  | 16.52 | 29.08 |
|           |       | MAE   | 12.96 | 22.22 |
|           |       | MBE   | 4.20  | 16.23 |
|           | AQ2   | r     | 0.93  | 0.76  |
|           |       | CRMSD | 15.35 | 25.44 |
|           |       | RMSE  | 17.88 | 42.98 |
|           |       | MAE   | 13.99 | 36.24 |
|           |       | MBE   | 9.17  | 34.64 |
| NO2       | AQ1   | r     | 0.75  | 0.65  |
|           |       | CRMSD | 11.25 | 11.83 |
|           |       | RMSE  | 12.64 | 13.48 |
|           |       | MAE   | 9.40  | 9.97  |
|           |       | MBE   | 5.75  | 6.46  |
|           | AQ2   | r     | 0.78  | 0.58  |
|           |       | CRMSD | 10.63 | 11.77 |
|           |       | RMSE  | 10.65 | 11.94 |
|           |       | MAE   | 7.72  | 9.12  |
|           |       | MBE   | -0.69 | 2.03  |

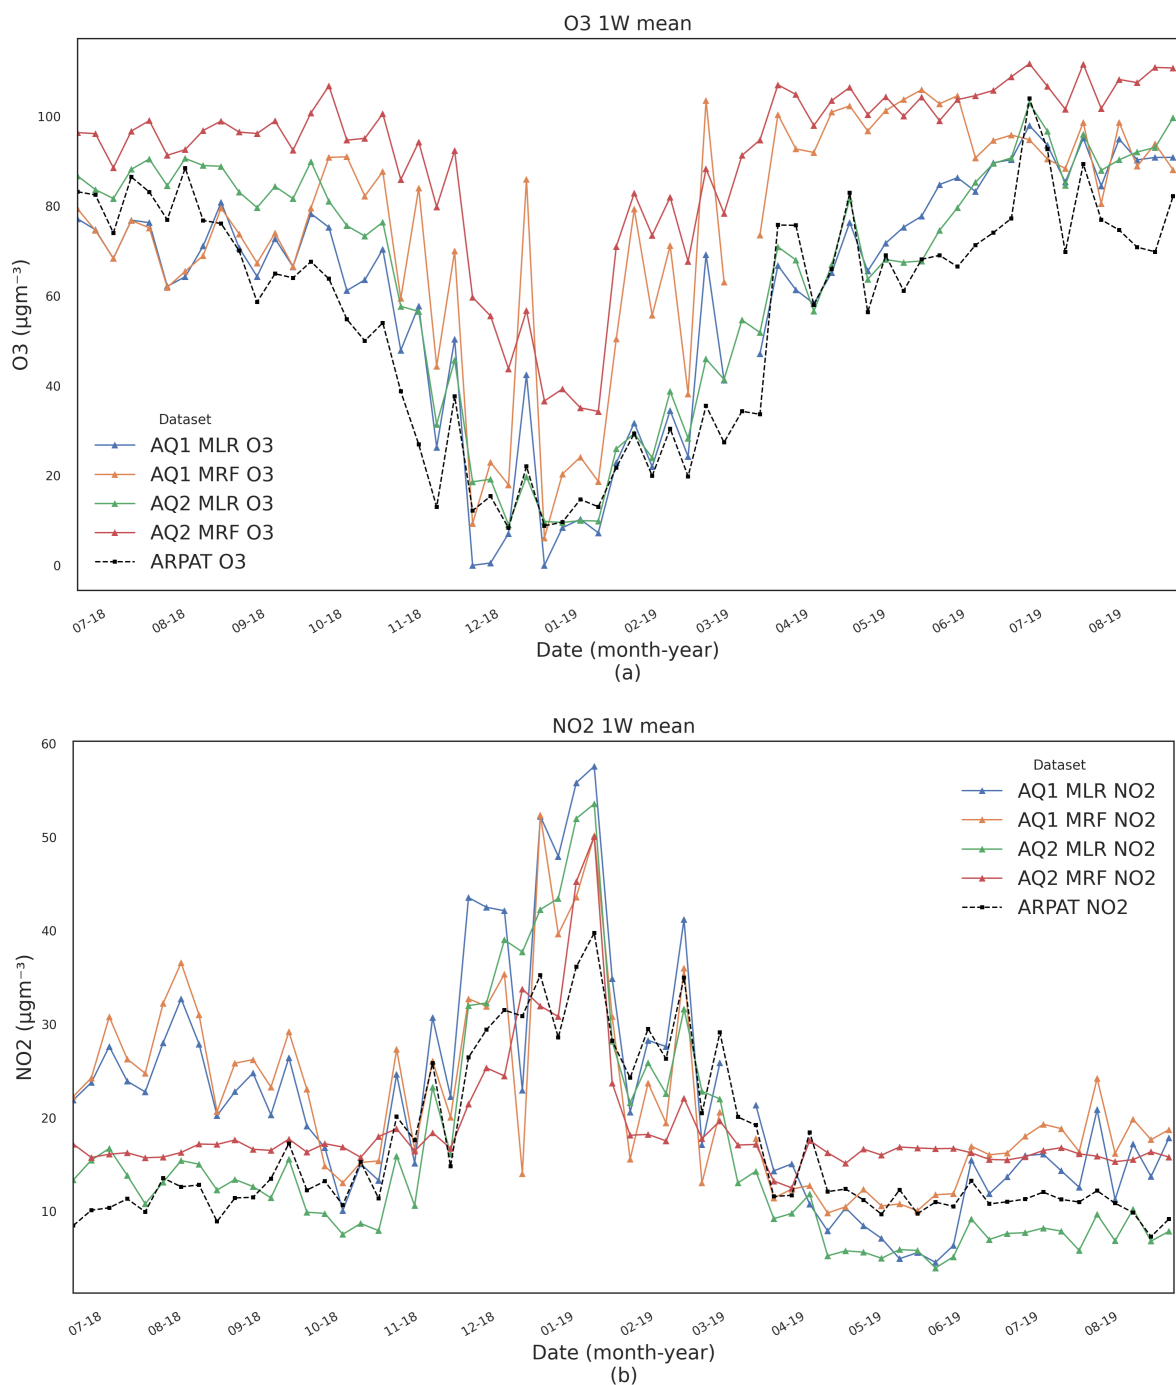

**Figure S10.** Trend analysis of 7-day average O<sub>3</sub> and NO<sub>2</sub> concentrations measured at the validation site by the calibrated AQ1 and AQ2 stations compared to the ARPAT reference station (17 June 2019–22 August 2019).

**Table S11.** Seasonal analysis of MFR validation. Min–Max ( $\mu\text{g m}^{-3}$ ) represents the minimum and maximum concentrations measured by the reference station, while intT is the average internal temperature measured by the AQ stations.

| Year | Season | Pollutant       | AQ id | min-max | intT  | r    | Stat. |       |       |
|------|--------|-----------------|-------|---------|-------|------|-------|-------|-------|
|      |        |                 |       |         |       |      | nRMSE | MAE   | MBE   |
| 2018 | Summer | O <sub>3</sub>  | AQ1   | 6 - 166 | 34.65 | 0.90 | 10.20 | 12.58 | -4.91 |
|      |        |                 | AQ2   | 6 - 166 | 34.20 | 0.84 | 15.59 | 20.68 | 16.52 |
|      |        | NO <sub>2</sub> | AQ1   | 1 - 47  | 34.62 | 0.64 | 42.26 | 16.00 | 15.87 |
|      |        |                 | AQ2   | 1 - 47  | 34.16 | 0.51 | 18.93 | 7.27  | 5.41  |
|      | Autumn | O <sub>3</sub>  | AQ1   | 2 - 146 | 28.06 | 0.84 | 21.49 | 24.43 | 22.53 |
|      |        |                 | AQ2   | 2 - 146 | 25.53 | 0.76 | 35.59 | 46.81 | 46.57 |
|      |        | NO <sub>2</sub> | AQ1   | 1 - 62  | 28.07 | 0.65 | 21.83 | 9.58  | 6.71  |
|      |        |                 | AQ2   | 1 - 62  | 25.54 | 0.43 | 18.02 | 8.85  | 1.04  |
|      | Winter | O <sub>3</sub>  | AQ1   | 2 - 65  | 16.60 | 0.88 | 52.57 | 22.13 | 21.12 |
|      |        |                 | AQ2   | 2 - 72  | 14.53 | 0.83 | 67.43 | 39.32 | 39.17 |
|      |        | NO <sub>2</sub> | AQ1   | 3 - 88  | 16.59 | 0.71 | 17.59 | 11.65 | 3.42  |
|      |        |                 | AQ2   | 2 - 88  | 14.53 | 0.57 | 20.64 | 13.40 | -2.82 |
| 2019 | Spring | O <sub>3</sub>  | AQ1   | 2 - 132 | 22.41 | 0.75 | 29.11 | 32.63 | 31.92 |
|      |        |                 | AQ2   | 2 - 132 | 21.14 | 0.68 | 35.91 | 40.38 | 39.57 |
|      |        | NO <sub>2</sub> | AQ1   | 2 - 63  | 22.32 | 0.67 | 12.73 | 5.67  | -0.54 |
|      |        |                 | AQ2   | 2 - 63  | 21.09 | 0.34 | 17.18 | 8.29  | 2.31  |
|      | Summer | O <sub>3</sub>  | AQ1   | 7 - 185 | 34.98 | 0.82 | 13.42 | 19.44 | 12.35 |
|      |        |                 | AQ2   | 7 - 185 | 32.29 | 0.75 | 20.71 | 31.31 | 28.19 |
|      |        | NO <sub>2</sub> | AQ1   | 0 - 47  | 34.94 | 0.50 | 22.19 | 8.19  | 6.81  |
|      |        |                 | AQ2   | 0 - 47  | 32.25 | 0.34 | 18.00 | 7.28  | 5.05  |
